# Supplementary material for: Synthesis of mesoporous NiCo2O4–rGO by a solvothermal method for charge storage applications
Source: Royal Society of Chemistry journal article supplement (doi:10.1039/c5ra11239g), 2015-01-01
Supplement: c5ra11239g1.pdf [file c5ra11239g1.pdf]

## Supporting Information

### **Synthesis of mesoporous NiCo<sub>2</sub>O<sub>4</sub>-rGO by solvothermal method for charge storage applications**

Ediga Umeshbabu,<sup>a</sup> G. Rajeshkhanna,<sup>a</sup> Ponniah Justin<sup>b</sup> and G. Ranga Rao<sup>a\*</sup>

<sup>a</sup>Department of Chemistry, Indian Institute of Technology Madras, Chennai - 600036, India

<sup>b</sup>Department of Chemistry, Rajiv Gandhi University of Knowledge Technologies, RK Valley, Kadapa- 516330, Andhra Pradesh, India

---

\*Corresponding author; Tel.: +91 44 2257 4226; Fax: +91 44 2257 4202; E-mail address:

[grrao@iitm.ac.in](mailto:grrao@iitm.ac.in) (G. Ranga Rao).

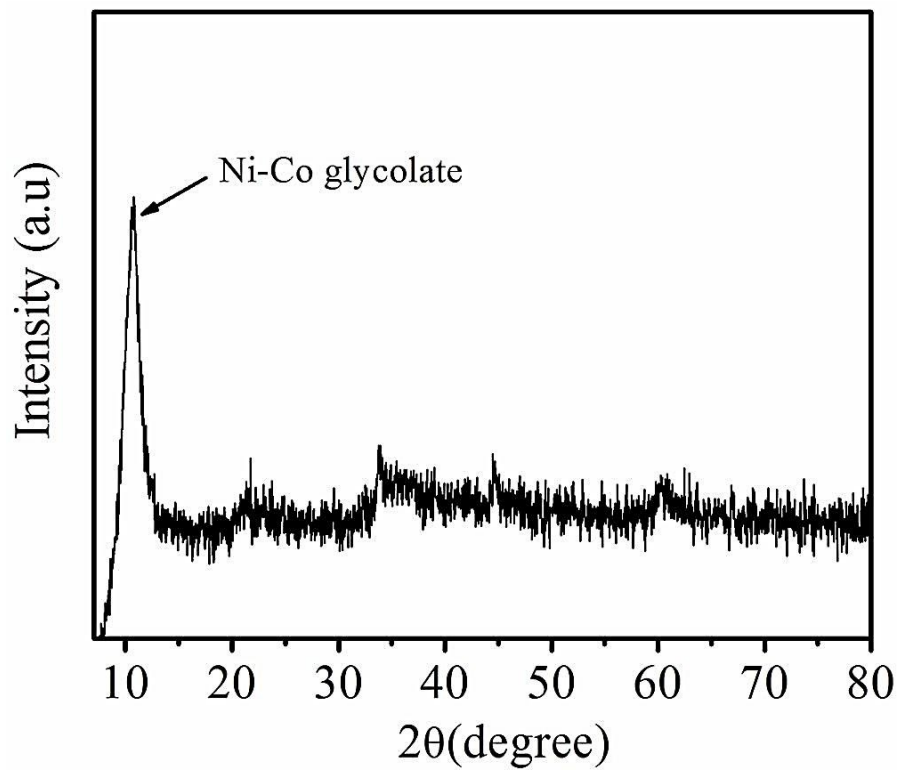

**Fig. S1** Powder XRD pattern of uncalcined NiCo-glycolate-rGO precursor.

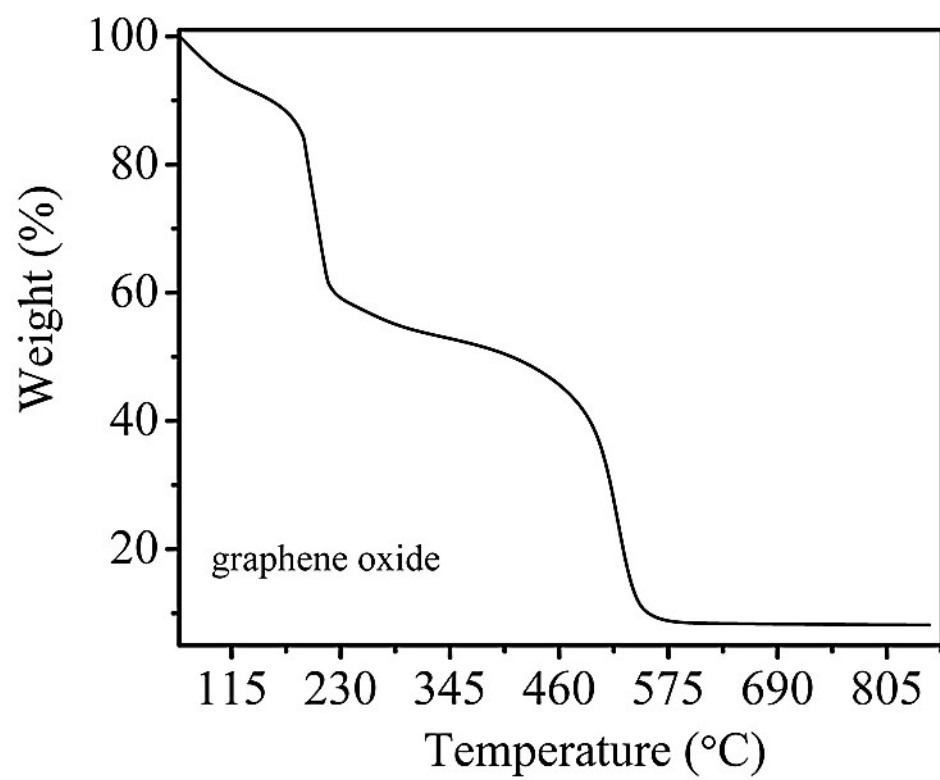

**Fig. S2** Thermogravimetric analysis (TGA) of graphene oxide

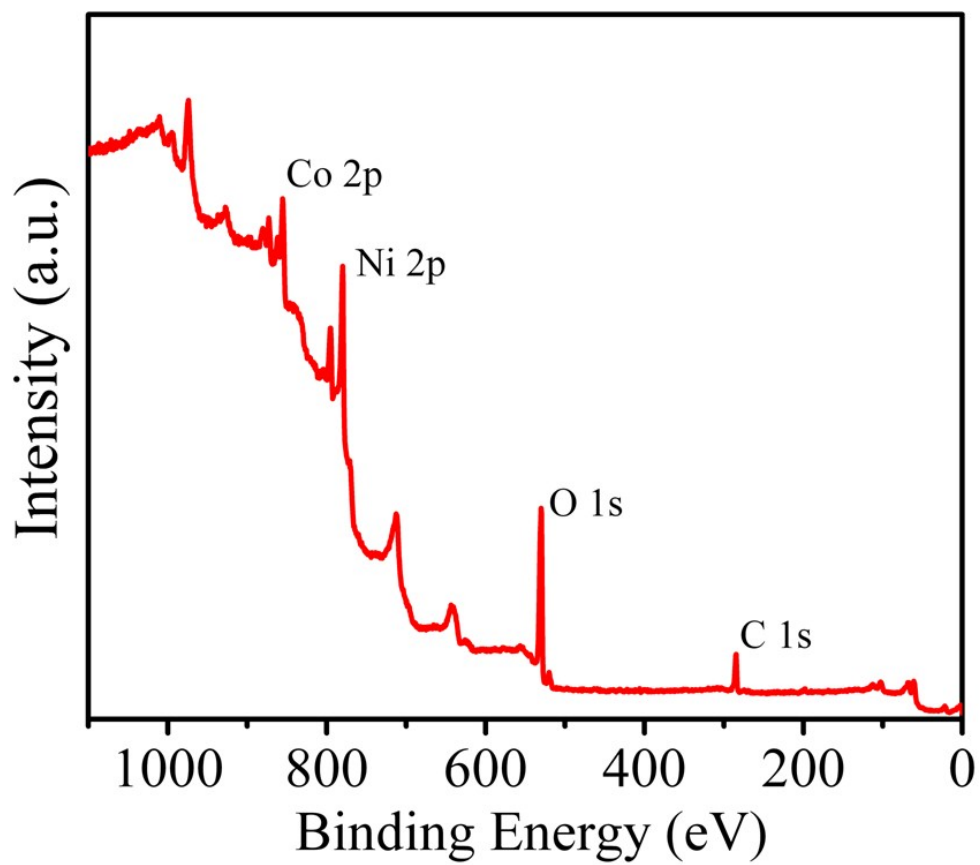

**Fig. S3** Full XPS survey spectra of the NiCo<sub>2</sub>O<sub>4</sub>-rGO hybrid nanocomposite.

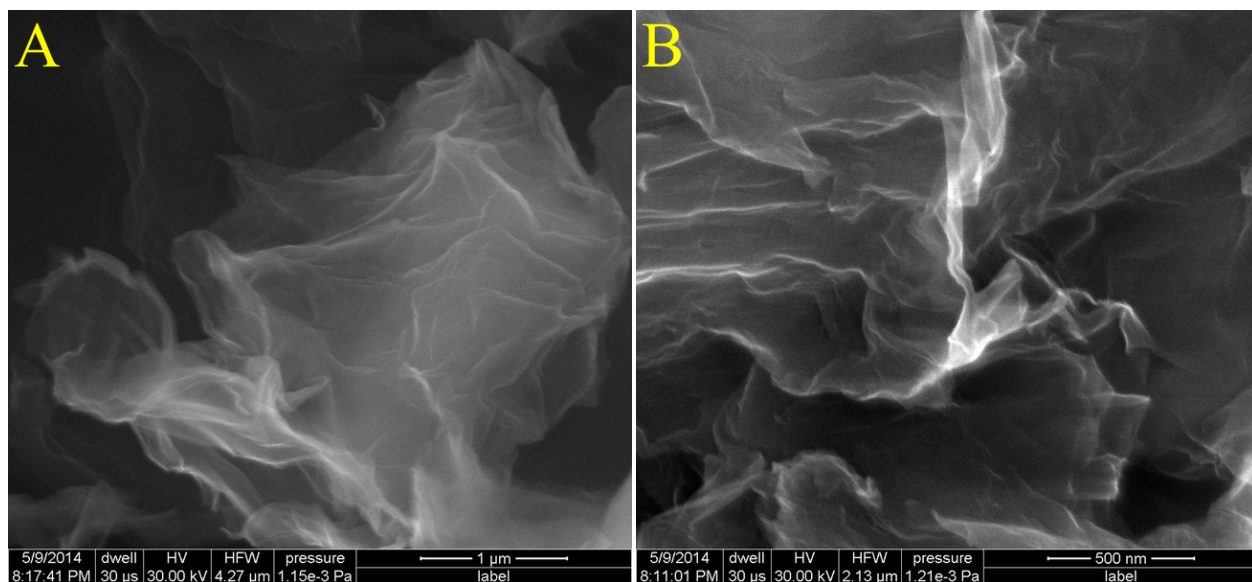

**Fig. S4** FESEM images of graphene oxide (GO) at different magnifications.

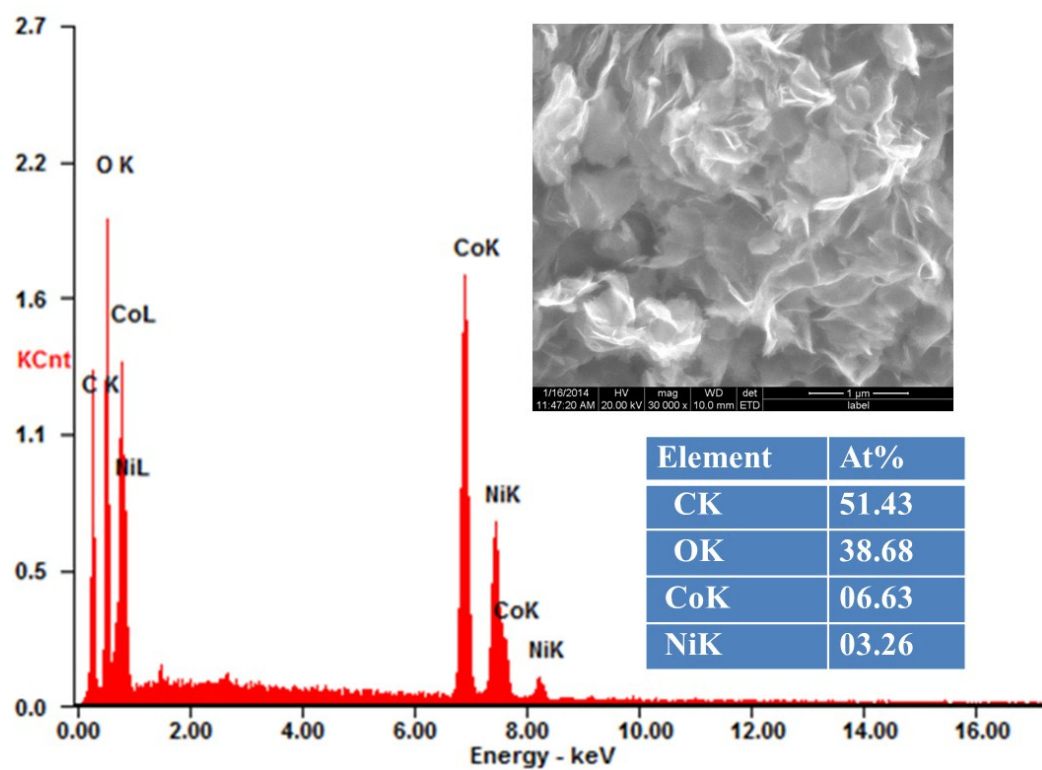

**Fig. S5** EDS spectrum of NiCo<sub>2</sub>O<sub>4</sub>-rGO composite.

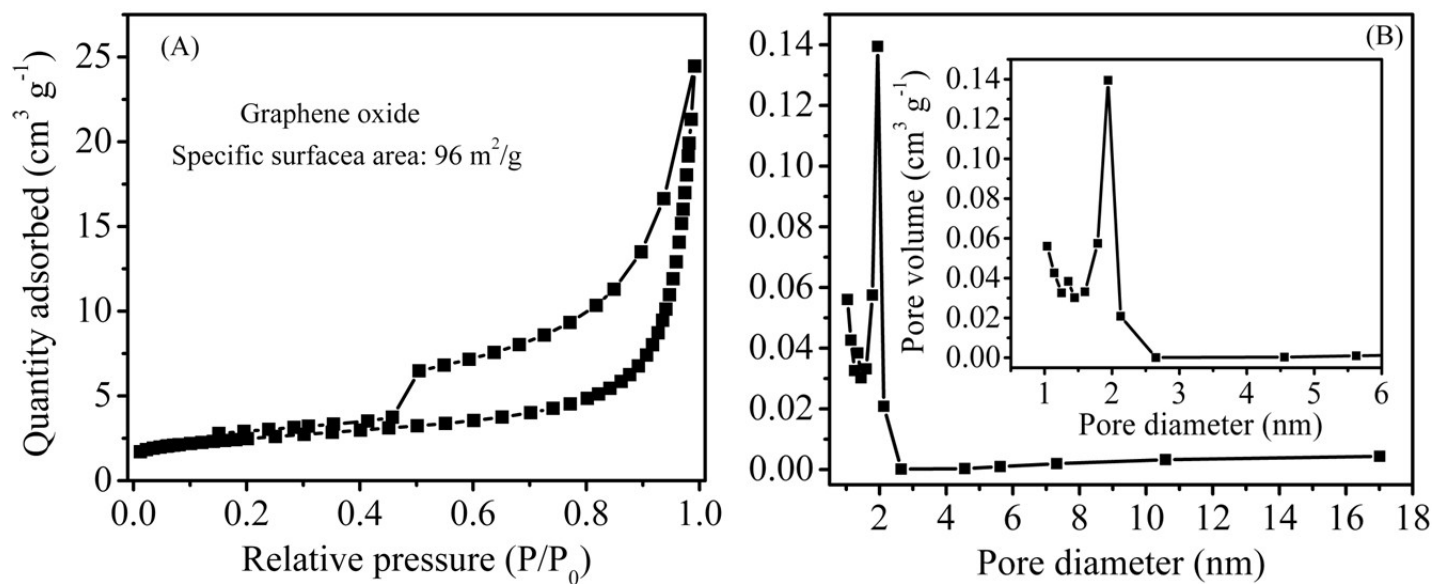

**Fig. S6** (A) N<sub>2</sub> adsorption-desorption isotherm and (B) BJH pore size distribution plots of graphene oxide (GO).

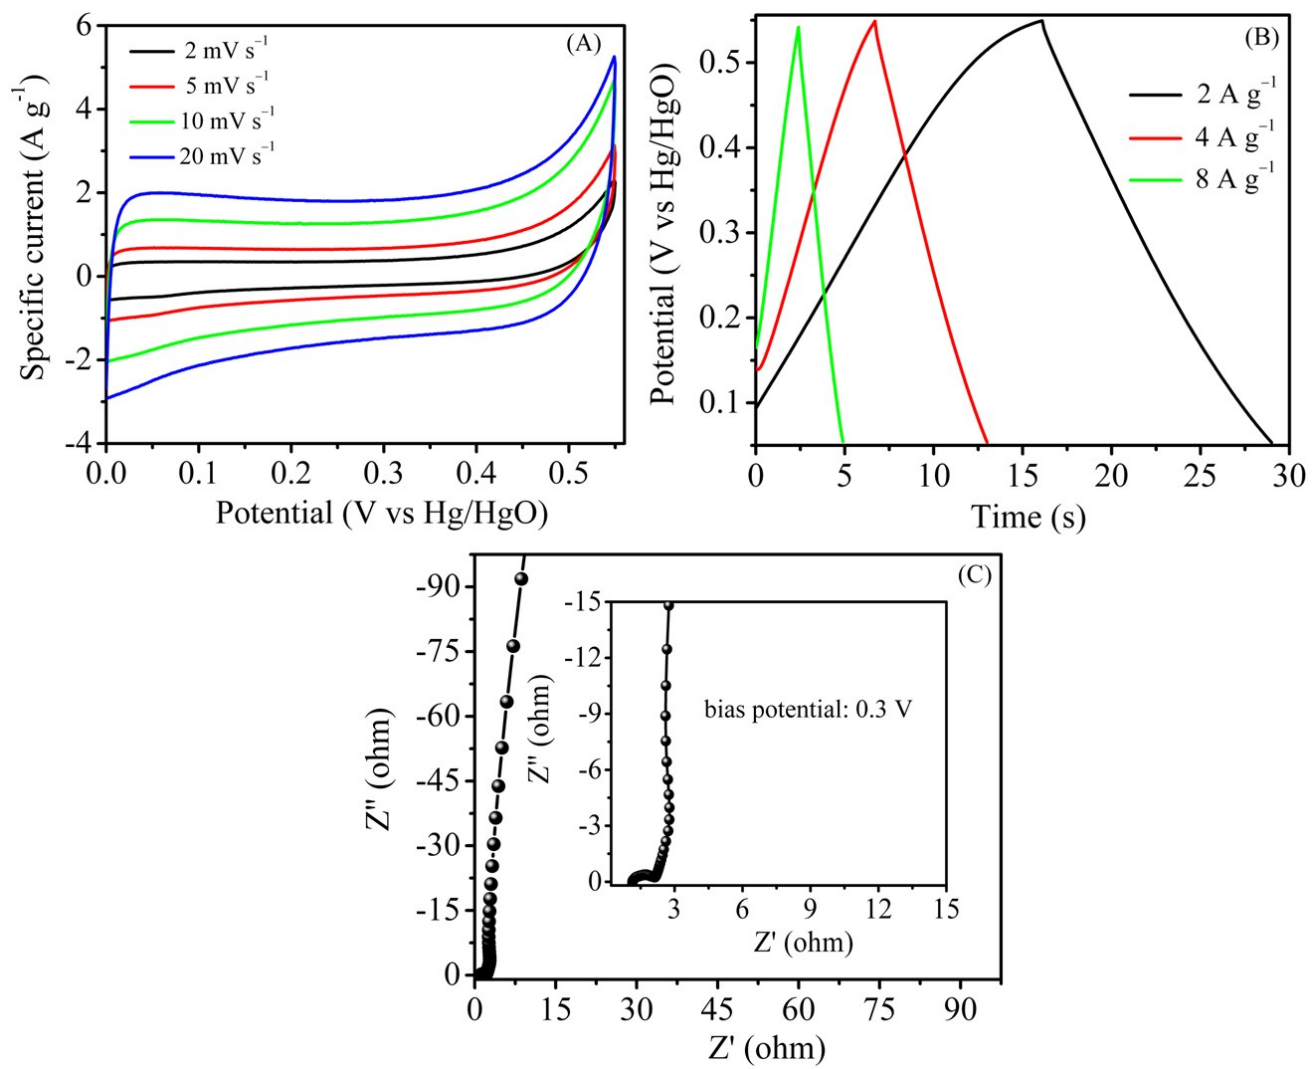

**Fig. S7** (A) Cyclic voltammograms, (B) charge-discharge curves and (C) complex plane impedance plots (Nyquist plots) of graphene oxide (GO).



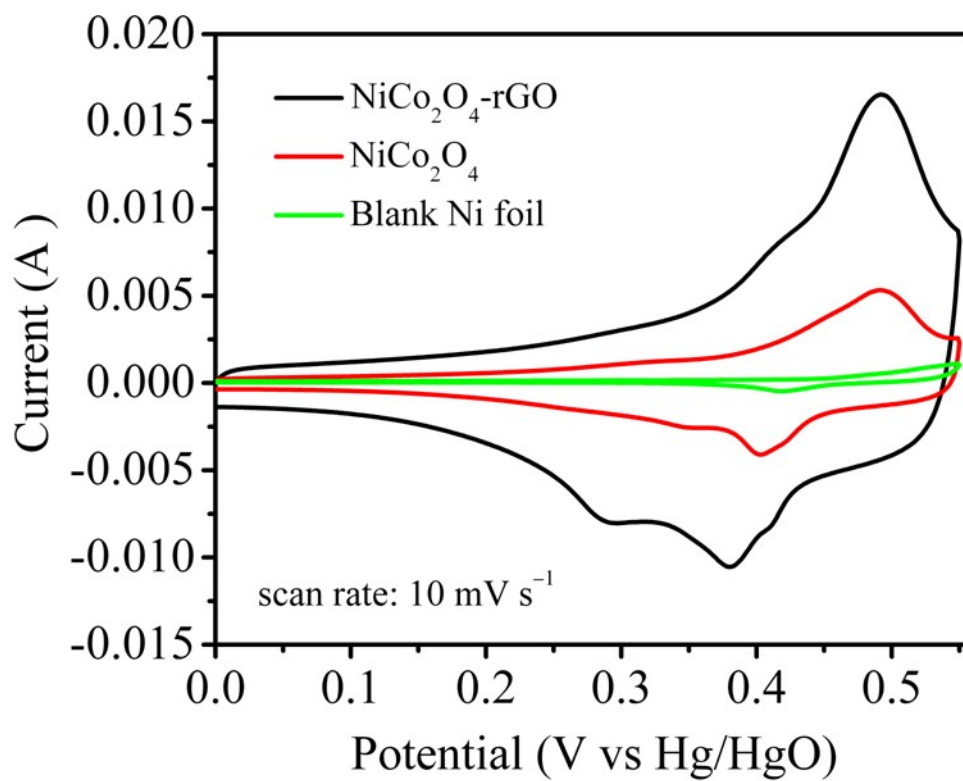

**Fig. S8** Comparison CV curves for bare Ni foil, pristine NiCo<sub>2</sub>O<sub>4</sub> and NiCo<sub>2</sub>O<sub>4</sub>-rGO electrodes at a scan rate of  $10 \text{ mV s}^{-1}$ .

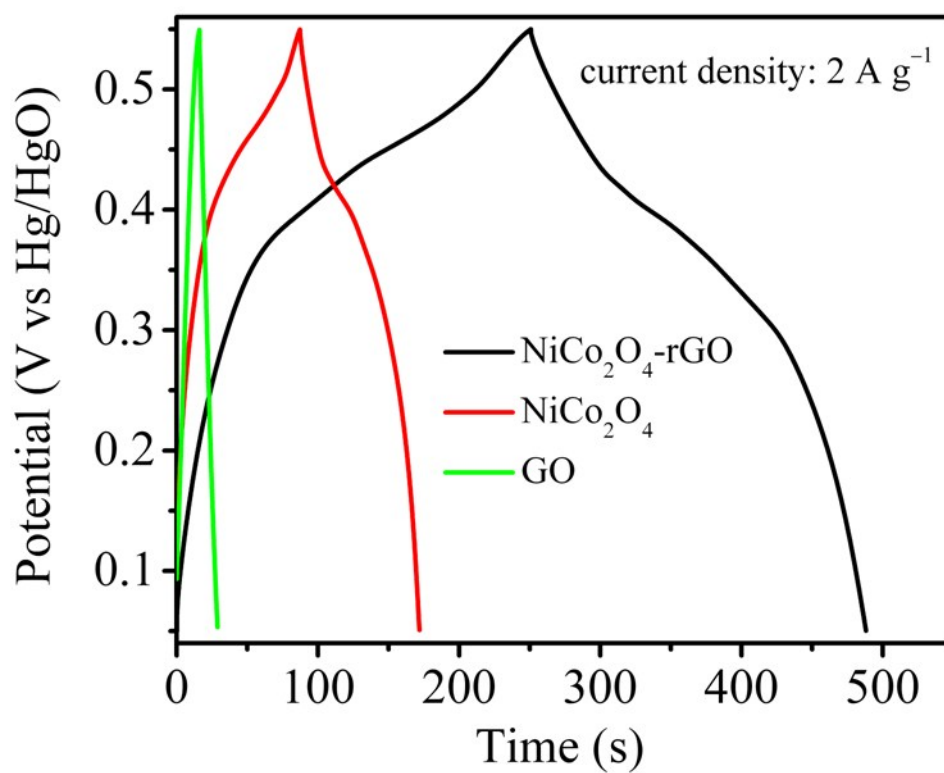

**Fig. S9** Comparison of CP curves for GO, pristine  $\text{NiCo}_2\text{O}_4$  and  $\text{NiCo}_2\text{O}_4\text{-rGO}$  composite at current density of  $2 \text{ A g}^{-1}$ .
